# Supplementary material
Source: MDPI journal article supplement (https://www.mdpi.com/2073-4395/13/10/2478)
Supplement: s1 [file s1]

Table. S1. Analysis of the soil that was used as a part of root growing medium.

| Sampling depth | Texture of soil | OM (%) | Phosphorus (ppm) | Potassium (%) | Clay (%) | Silt (%) | Sand (%) | EC  | SP (%) |
|----------------|-----------------|--------|------------------|---------------|----------|----------|----------|-----|--------|
| 0-30           | loamy sand      | 2.01   | 4.9              | 17            | 12.4     | 32.8     | 54.8     | 2.8 | 35.7   |

OM: Organic matter  
SP: Saturation percentage

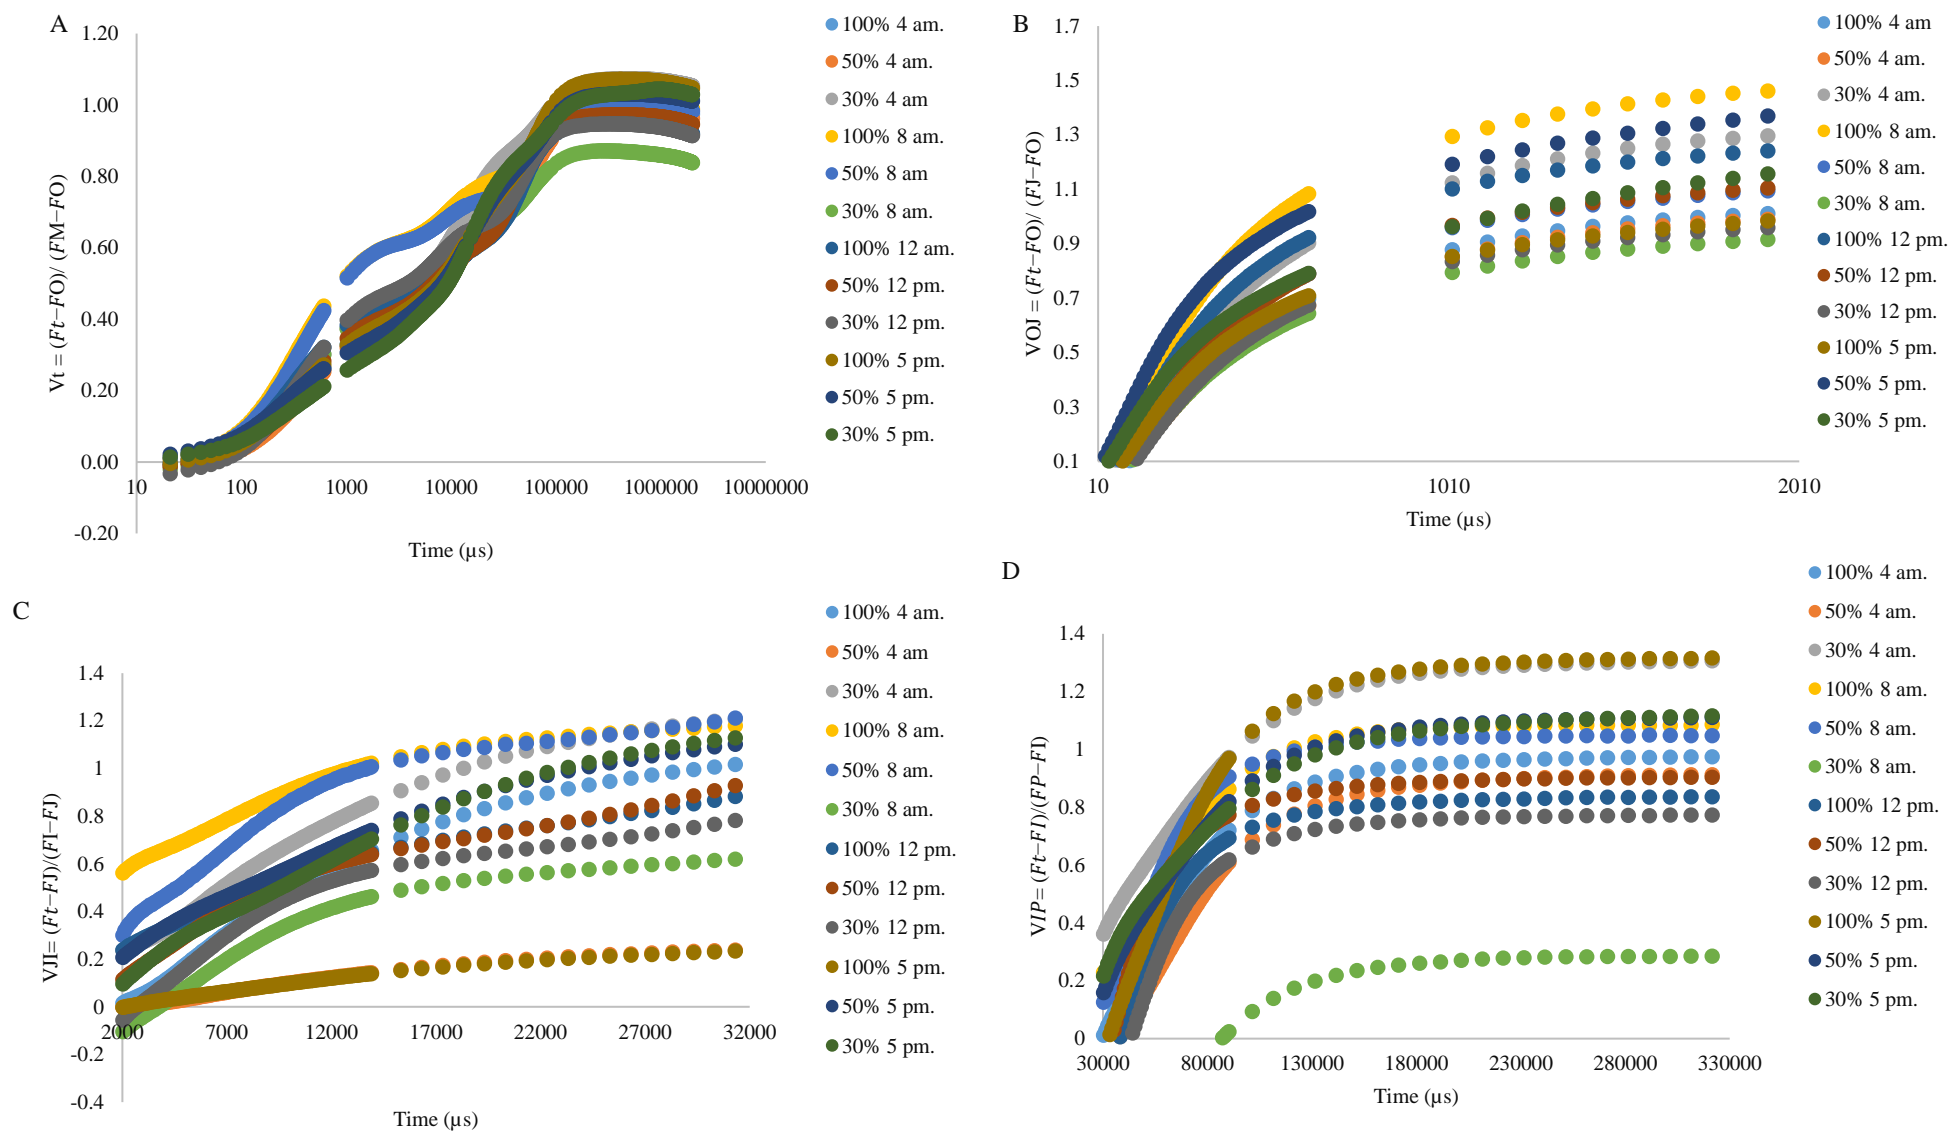

Figure. S1. Effect of different light intensities (100%: 100% of full sunlight, 50%: 50% of full sunlight and 30: 30% of full sunlight) and time-courses of a day on  $V_t$  (A),  $VOJ$  (B) ,  $V_{JI}$  (C) and  $VIP$ (D) in green basil.

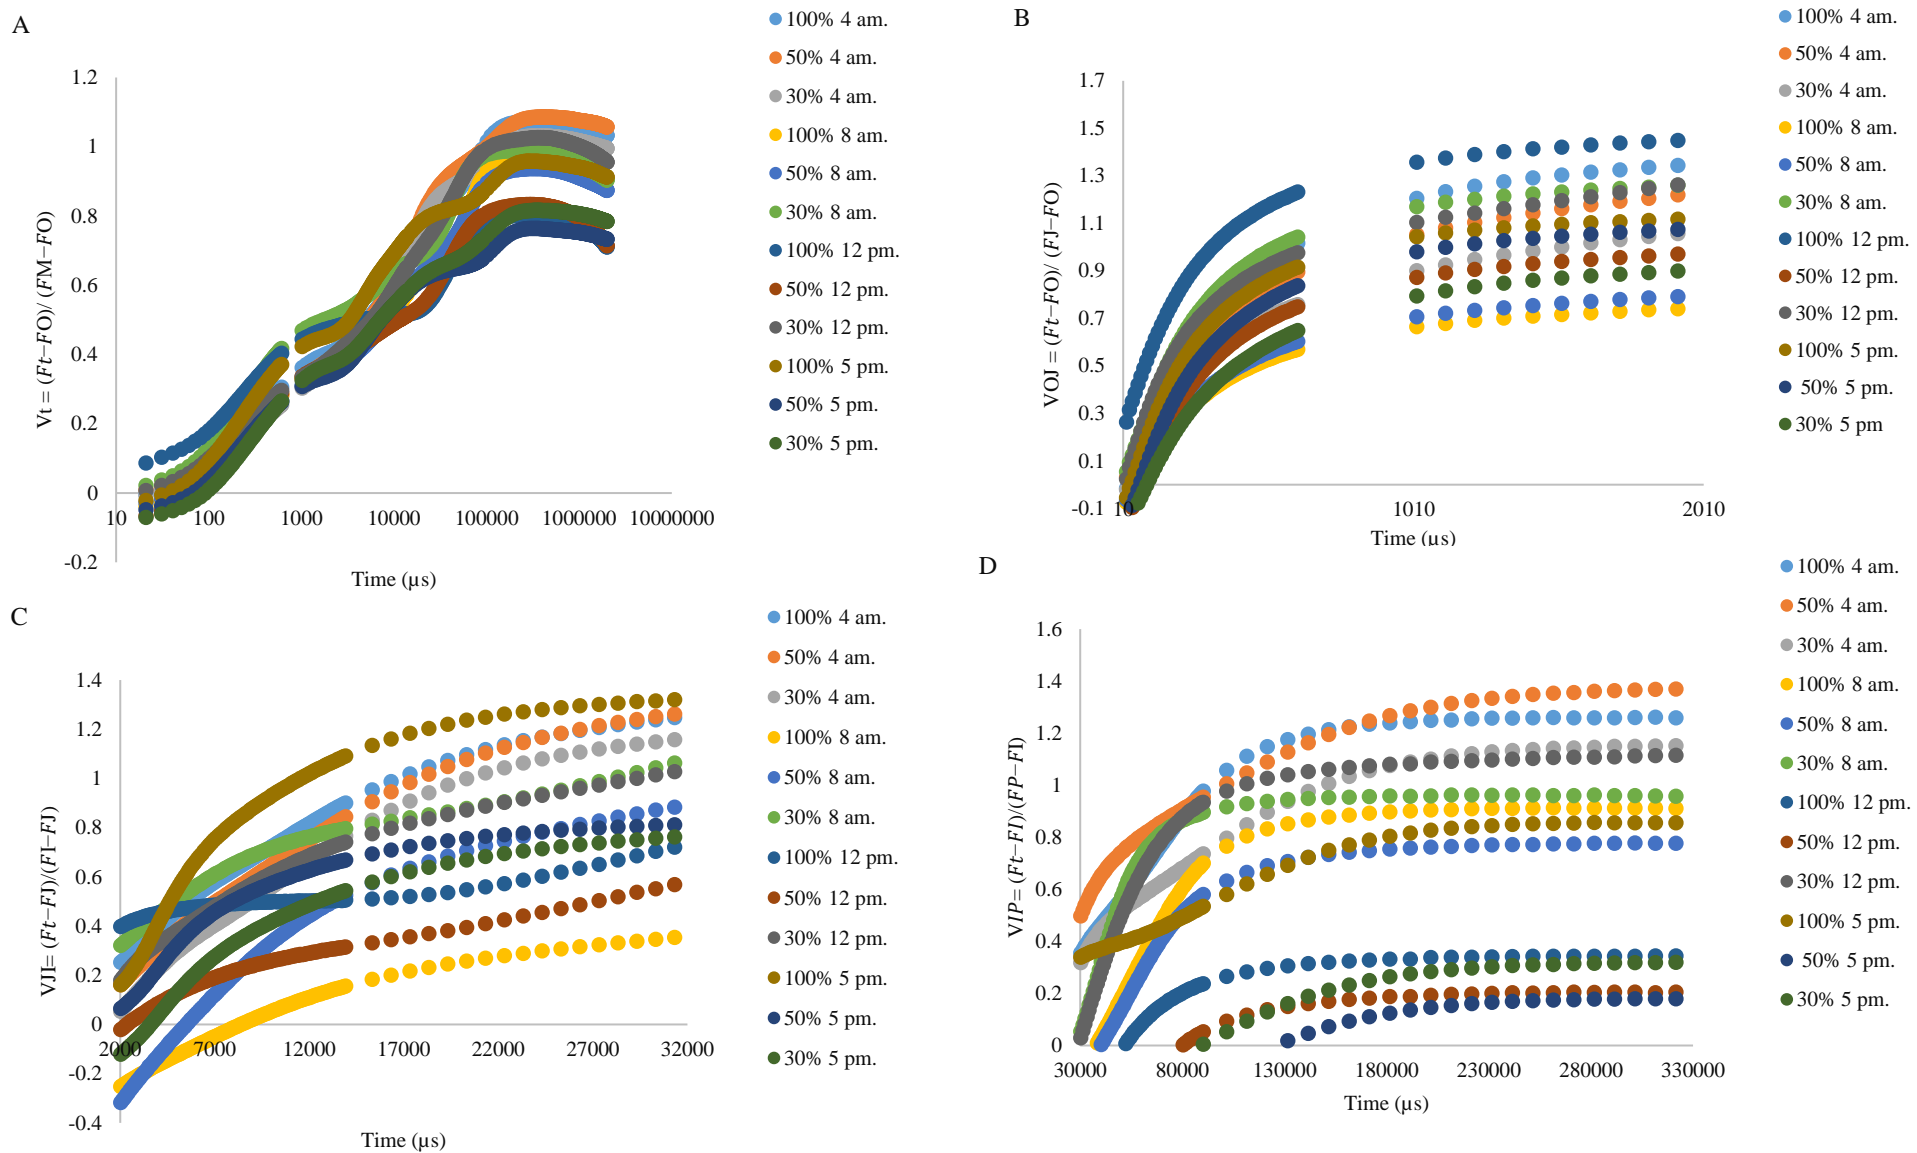

Figure S2. Effect of different light intensities (100%: 100% of full sunlight, 50%: 50% of full sunlight and 30: 30% of full sunlight) and time-courses of a day on  $V_t$  (A),  $VOJ$  (B) ,  $VJI$  (C) and  $VIP$ (D) in purple basil.
